# Supplementary material
Source: HighWire-hosted journal article supplement (https://thorax.bmj.com/content/78/8/840)
Supplement: inline-supplementary-material-1 [file inline-supplementary-material-1.pdf]

| Group rank from 2 <sup>nd</sup> survey | People with CF                                                                                                                                  | Family & Friends                                                                                                                                | Health care professionals & researchers                                                                                                          | People with CF not on modulator therapy                                                                                                    |
|----------------------------------------|-------------------------------------------------------------------------------------------------------------------------------------------------|-------------------------------------------------------------------------------------------------------------------------------------------------|--------------------------------------------------------------------------------------------------------------------------------------------------|--------------------------------------------------------------------------------------------------------------------------------------------|
| 1                                      | What are the long-term effects of CFTR modulators?*                                                                                             | Can genetic therapies (such as gene editing, stem cell and mRNA technology) be used as a treatment for CF?                                      | What are the long-term effects of CFTR modulators?*                                                                                              | Are options available for those not able to take current CFTR modulators (including rarer mutations, not eligible and unable to tolerate)? |
| 2                                      | Are people with CF at higher risk of certain cancers and what is the best way to detect and manage cancers in people with CF?                   | What are the long-term effects of CFTR modulators?*                                                                                             | Are options available for those not able to take current CFTR modulators (including rarer mutations, not eligible and unable to tolerate)?       | Can genetic therapies (such as gene editing, stem cell and mRNA technology) be used as a treatment for CF?                                 |
| 3                                      | Are options available for those not able to take current CFTR modulators (including rarer mutations, not eligible and unable to tolerate)?      | Are options available for those not able to take current CFTR modulators (including rarer mutations, not eligible and unable to tolerate)?      | What are the effective ways of simplifying the treatment burden of people with CF?                                                               | How best to manage and support people with CF post-transplantation (e.g. mental health, rejection, modulator use)?                         |
| 4                                      | Can genetic therapies (such as gene editing, stem cell and mRNA technology) be used as a treatment for CF?                                      | What are the effects of modulators on systems outside the lungs such as pancreatic function, liver disease, gastrointestinal, bone density etc? | Can genetic therapies (such as gene editing, stem cell and mRNA technology) be used as a treatment for CF?                                       | How to improve breathing capacity/lung volume?                                                                                             |
| 5                                      | What are the effects of modulators on systems outside the lungs such as pancreatic function, liver disease, gastrointestinal, bone density etc? | What is the optimum treatment regimen for eradication of Pseudomonas in people with CF?                                                         | What is the best way to diagnose lung infection when there is no sputum e.g. children and those on modulators?                                   | Is there a way of reducing the negative effects of antibiotics e.g. resistance risk and adverse symptoms in people with CF?                |
| 6                                      | How do we manage an ageing population with CF?                                                                                                  | What are the effective ways of simplifying the treatment burden of people with CF?                                                              | What are the effects of modulators on systems outside the lungs such as pancreatic function, liver disease, gastrointestinal, bone density etc.? |                                                                                                                                            |
| 7                                      | How can we recognise and manage the side-effects of CFTR modulators (including those at greater risk e.g. liver disease)?                       | Is there a way of preventing CF related diabetes (CFRD) in people with CF?                                                                      | How do we manage an ageing population with CF?                                                                                                   |                                                                                                                                            |
| 8                                      | How can we relieve gastro-intestinal symptoms, such as stomach pain, bloating and nausea?                                                       | How can we recognise and manage the side-effects of CFTR modulators (including those at greater risk e.g. liver disease)?                       | What effective ways of motivation, support and technologies help people with CF improve and sustain adherence to treatment?                      |                                                                                                                                            |
| 9                                      | Is there a way of preventing CF related diabetes (CFRD) in people with CF?                                                                      | How can we relieve gastro-intestinal symptoms, such as stomach pain, bloating and nausea?                                                       | Is there a way of preventing CF related diabetes (CFRD) in people with CF?                                                                       |                                                                                                                                            |
| 10                                     | How to improve breathing capacity/lung volume?                                                                                                  | What are the long-term effects of medications for CF?*                                                                                          | Can exercise replace chest physiotherapy in people with CF?                                                                                      |                                                                                                                                            |

Supplement 1: Table showing the questions taken forward from the ranking survey to the final workshop for each group. \* marks questions that were merged into a new question “What are the long-term effects of medications (including CFTR modulators) in CF?” on management group consensus as felt to be too similar.
